# Supplementary material for: Molecular dynamics simulations reveal the mechanism of graphene oxide nanosheet inhibition of Aβ1–42 peptide aggregation
Source: Royal Society of Chemistry journal article supplement (doi:10.1039/c9cp01803d), 2019-01-01
Supplement: c9cp01803d1.pdf [file c9cp01803d1.pdf]

## Supporting Information

### Molecular dynamics simulations reveal the mechanism of graphene oxide nanosheet towards the inhibition of A $\beta$ <sub>1-42</sub> peptide aggregation

Yibo Jin, Yunxiang Sun, Yujie Chen, Jiangtao Lei, Guanghong Wei\*

Department of Physics, State Key Laboratory of Surface Physics, Key Laboratory for Computational Physical Sciences (Ministry of Education), 220 Handan Road, Shanghai 200433, People's Republic of China

\*Corresponding author: Guanghong Wei, E-mail: [ghwei@fudan.edu.cn](mailto:ghwei@fudan.edu.cn)

**This material contains two supplemental tables and twelve supplementary figures.**

#### Two supplemental tables:

**Table S1:** Temperature (K) list used in the 54-replica REMD simulations of A $\beta$ <sub>42</sub>-dimer system:

|        |        |        |        |        |        |        |        |        |
|--------|--------|--------|--------|--------|--------|--------|--------|--------|
| 306.30 | 308.16 | 310.03 | 311.91 | 313.80 | 315.70 | 317.60 | 319.51 | 321.44 |
| 323.37 | 325.32 | 327.26 | 329.22 | 331.19 | 333.16 | 335.14 | 337.13 | 339.14 |
| 341.15 | 343.17 | 345.20 | 347.24 | 349.29 | 351.35 | 353.41 | 355.49 | 357.58 |
| 359.67 | 361.78 | 363.90 | 366.08 | 368.22 | 370.37 | 372.52 | 374.69 | 376.86 |
| 379.05 | 381.24 | 383.45 | 385.66 | 387.89 | 390.12 | 392.37 | 394.62 | 396.89 |
| 399.17 | 401.45 | 403.75 | 406.06 | 408.38 | 410.71 | 413.05 | 415.41 | 417.77 |

**Table S2:** Temperature (K) list used in the 54-replica REMD simulations of A $\beta$ <sub>42</sub>-dimer+GO system:

|        |        |        |        |        |        |        |        |        |
|--------|--------|--------|--------|--------|--------|--------|--------|--------|
| 308.24 | 310.09 | 311.96 | 313.83 | 315.71 | 317.60 | 319.50 | 321.40 | 323.32 |
| 325.24 | 327.18 | 329.12 | 331.07 | 333.04 | 335.01 | 336.99 | 338.98 | 340.98 |
| 342.98 | 345.00 | 347.02 | 349.06 | 351.11 | 353.16 | 355.23 | 357.30 | 359.39 |
| 361.48 | 363.58 | 365.70 | 367.82 | 369.96 | 372.10 | 374.25 | 376.42 | 378.59 |
| 380.78 | 382.98 | 385.18 | 387.40 | 389.63 | 391.87 | 394.11 | 396.37 | 398.65 |
| 400.93 | 403.22 | 405.52 | 407.83 | 410.16 | 412.49 | 414.84 | 417.19 | 419.56 |

**Twelve supplementary figures:**

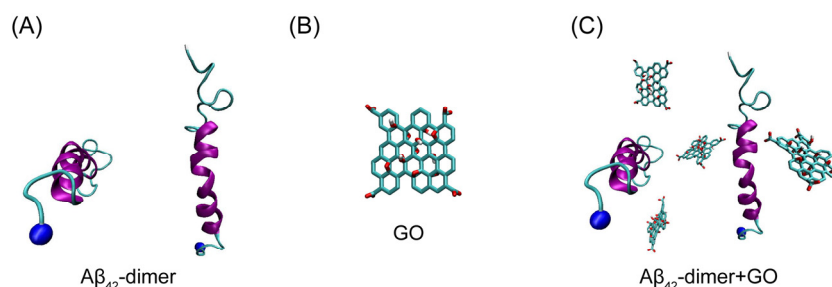

**Fig. S1** The initial structure of the  $A\beta_{1-42}$  ( $A\beta_{42}$  for short) dimer ( $A\beta_{42}$ -dimer system), the chemical structure of a GO nanosheet and the initial state of the  $A\beta_{42}$  dimer with four pieces of GO nanosheets ( $A\beta_{42}$ -dimer+GO system). (A) The  $A\beta_{42}$  monomer taken from the NMR derived structure (PDB ID: 1Z0Q). (B) The chemical structure of a GO nanosheet. The GO nanosheet is in a stick representation. (C) The initial state of the  $A\beta_{42}$  dimer with four pieces of GO nanosheets. The  $C\alpha$  positions of D1 residues are represented by a ball.

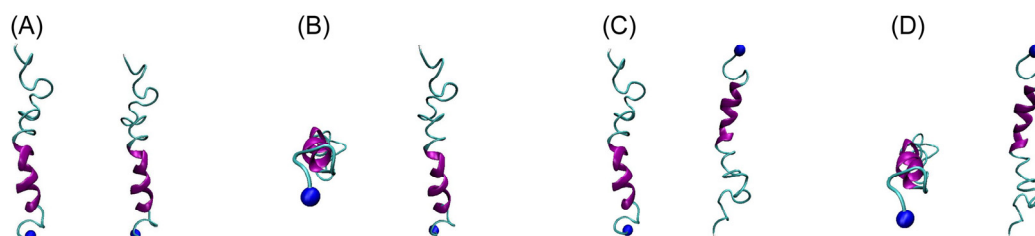

**Fig. S2** The initial conformation of  $A\beta_{42}$  dimer used for our REMD simulations: (A) dimer with parallel orientation, (B) (D) dimer with cross orientation, (C) dimer with anti-parallel orientation.

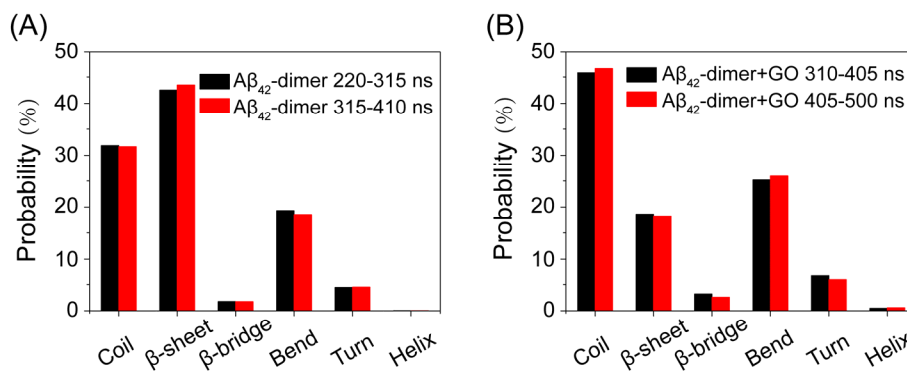

**Fig. S3** The averaged secondary structure probability for the  $A\beta_{42}$  dimer system (A) using 220-315 ns and 315-410 ns intervals and  $A\beta_{42}$  dimer with GO nanosheets system (B) using 310-405 ns and 405-500 ns intervals, respectively.

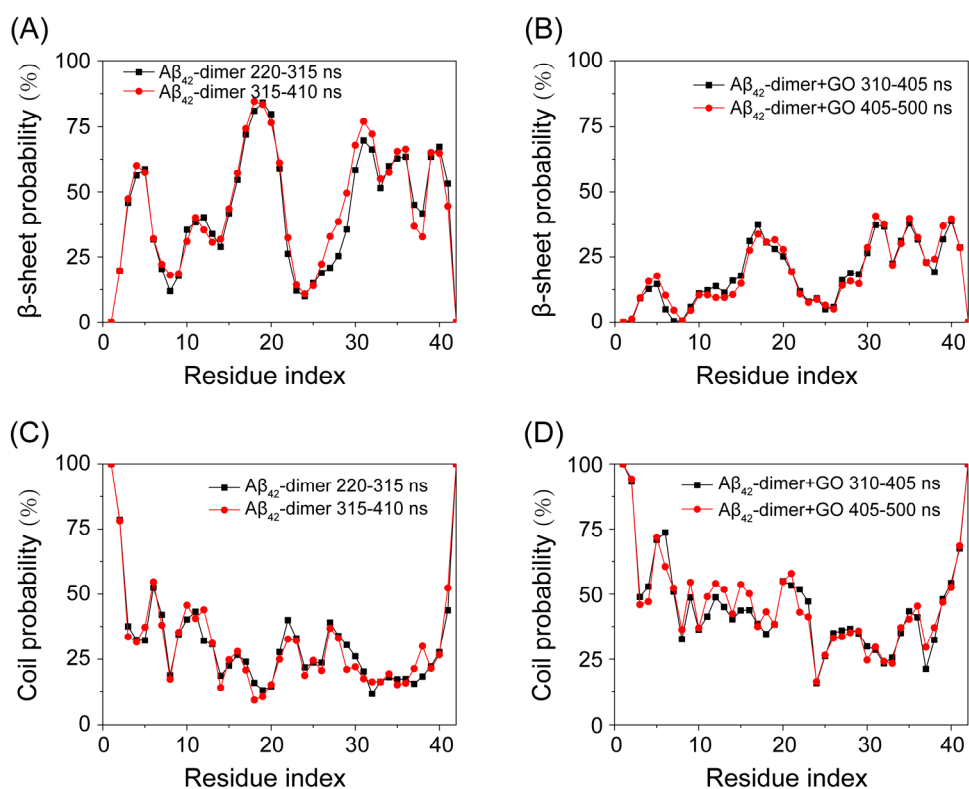

**Fig. S4** Residue-based  $\beta$ -sheet and coil probability in REMD runs with the time intervals of 220-315 ns and 315-410 ns for  $A\beta_{42}$ -dimer system (A, C) and 310-405 ns and 405-500 ns for  $A\beta_{42}$ -dimer+GO system (B, D).

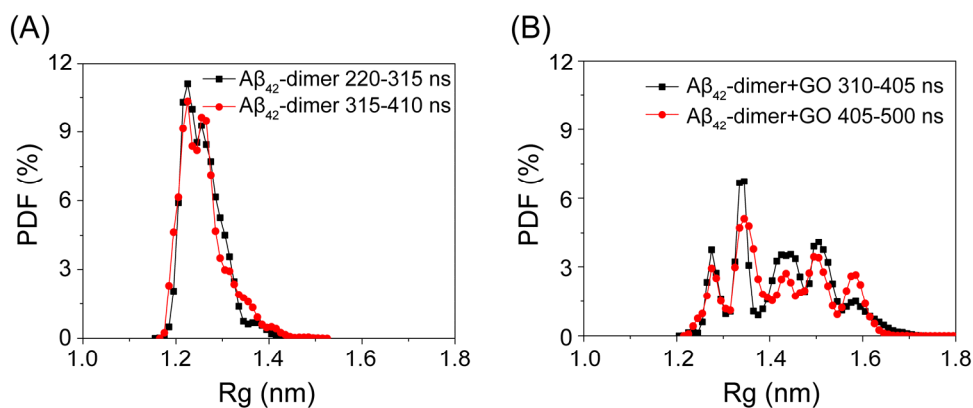

**Fig. S5** The probability density function (PDF) of radius of gyration ( $R_g$ ) for the  $A\beta_{42}$ -dimer system (A) using 220-315 ns and 315-410 ns intervals and  $A\beta_{42}$ -dimer+GO system (B) using 310-405 ns and 405-500 ns intervals, respectively.

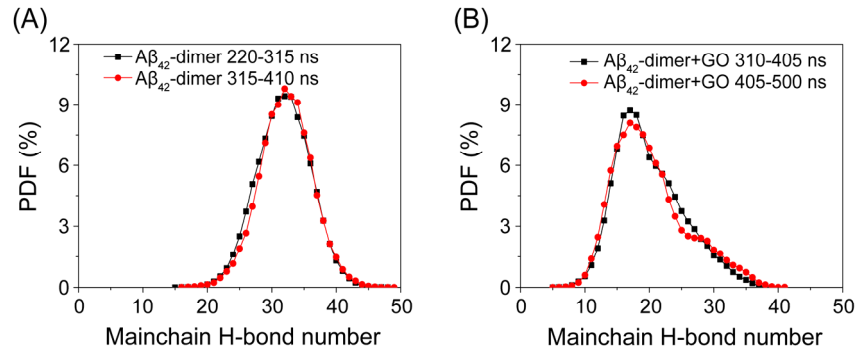

**Fig. S6** The number of mainchain hydrogen bonds (H-bond) for the Aβ<sub>42</sub>-dimer system (A) using 220-315 ns and 315-410 ns intervals and Aβ-dimer+GO system (B) using 310-405 ns and 405-500 ns intervals, respectively.

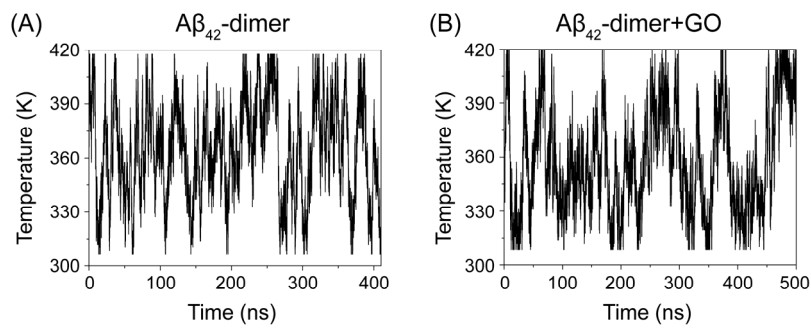

**Fig. S7** The time evolution of temperature swapping of one representative replica in temperature space for Aβ<sub>42</sub>-dimer system (A) and Aβ<sub>42</sub>-dimer+GO system (B).

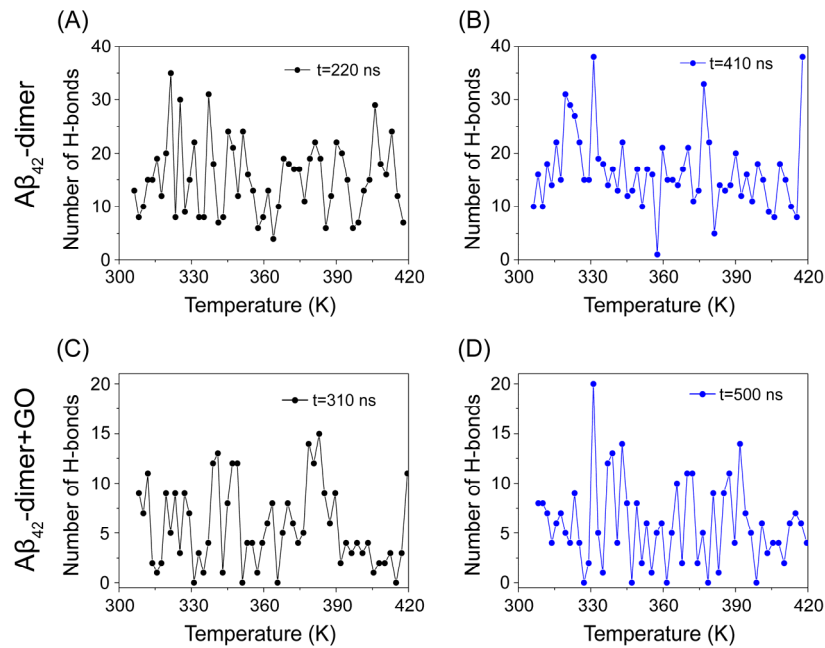

**Fig. S8** Number of inter-chain H-bonds of the 54 replicas from 306 to 417 K at t=220 and 340 ns for Aβ<sub>42</sub>-dimer (A, B) and from 308 to 419 K at t=310 and 500 ns Aβ<sub>42</sub>-dimer+GO (C, D) systems.

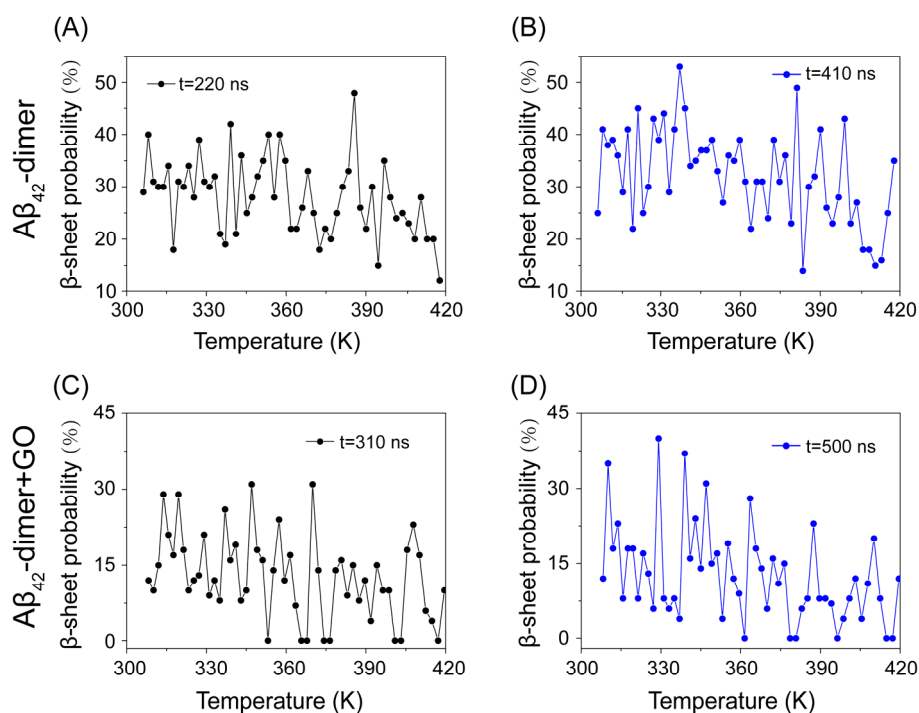

**Fig. S9**  $\beta$ -sheet probability of the 54 replicas from 306 to 417 K at  $t=220$  and 410 ns for  $\text{A}\beta_{42}$ -dimer (A, B) and from 308 to 419 K at  $t=310$  and 500 ns  $\text{A}\beta_{42}$ -dimer+GO (C, D) systems.

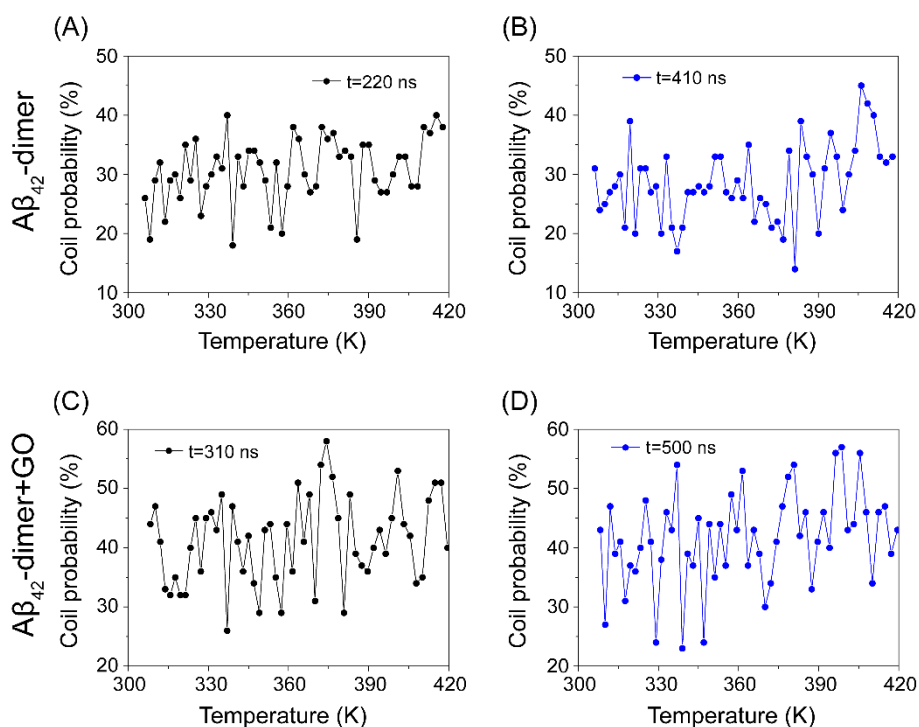

**Fig. S10** Coil probability of the 54 replicas from 306 to 417 K at  $t=220$  and 410 ns for  $\text{A}\beta_{42}$ -dimer (A, B) and from 308 to 419 K at  $t=310$  and 500 ns  $\text{A}\beta_{42}$ -dimer+GO (C, D) systems.

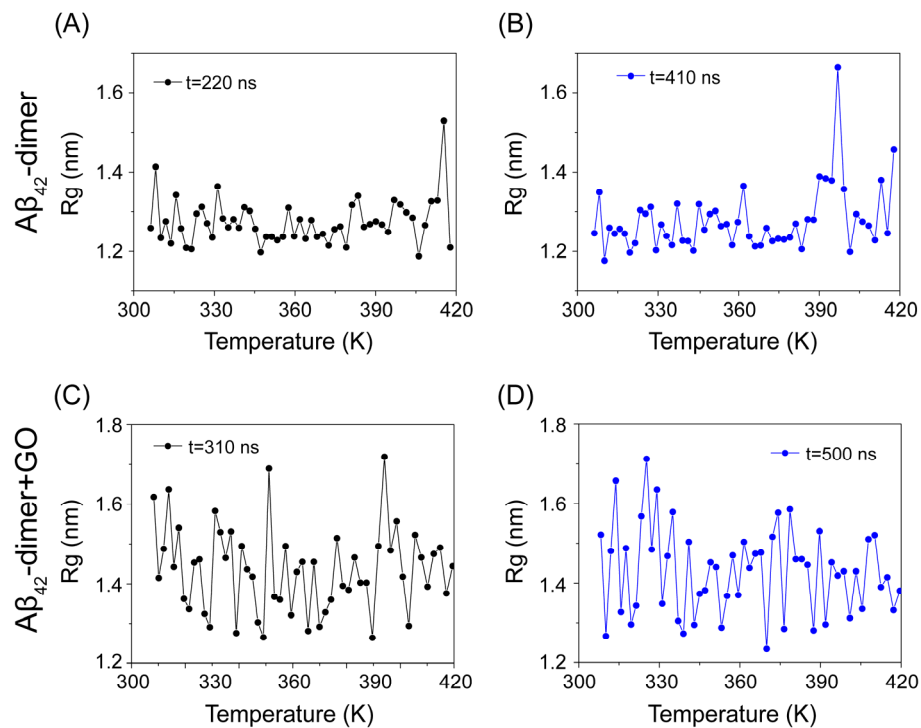

**Fig. S11**  $R_g$  of the 54 replicas from 306 to 417 K at  $t=220$  and 410 ns for  $A\beta_{42}$ -dimer (A, B) and from 308 to 419 K at  $t=310$  and 500 ns for  $A\beta_{42}$ -dimer+GO (C, D) systems.

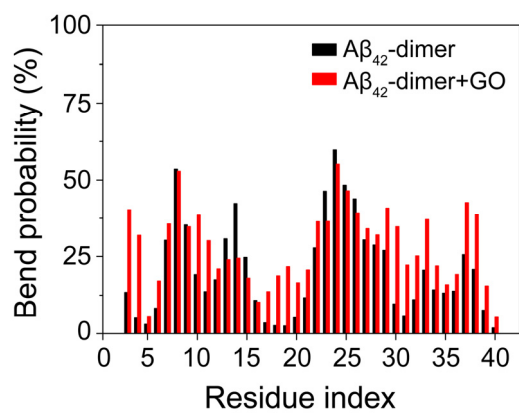

**Fig. S12** Residue-based bend probability of the  $A\beta_{42}$  dimer in  $A\beta_{42}$ -dimer and  $A\beta_{42}$ -dimer+GO systems.
